# Supplementary material
Source: PubMed Central journal article supplement (PMC2780800)
Supplement: 0907714106_0907714106SI.pdf [file 0907714106_0907714106SI.pdf]

# Supporting Information

Schindl et al. 10.1073/pnas.0907714106

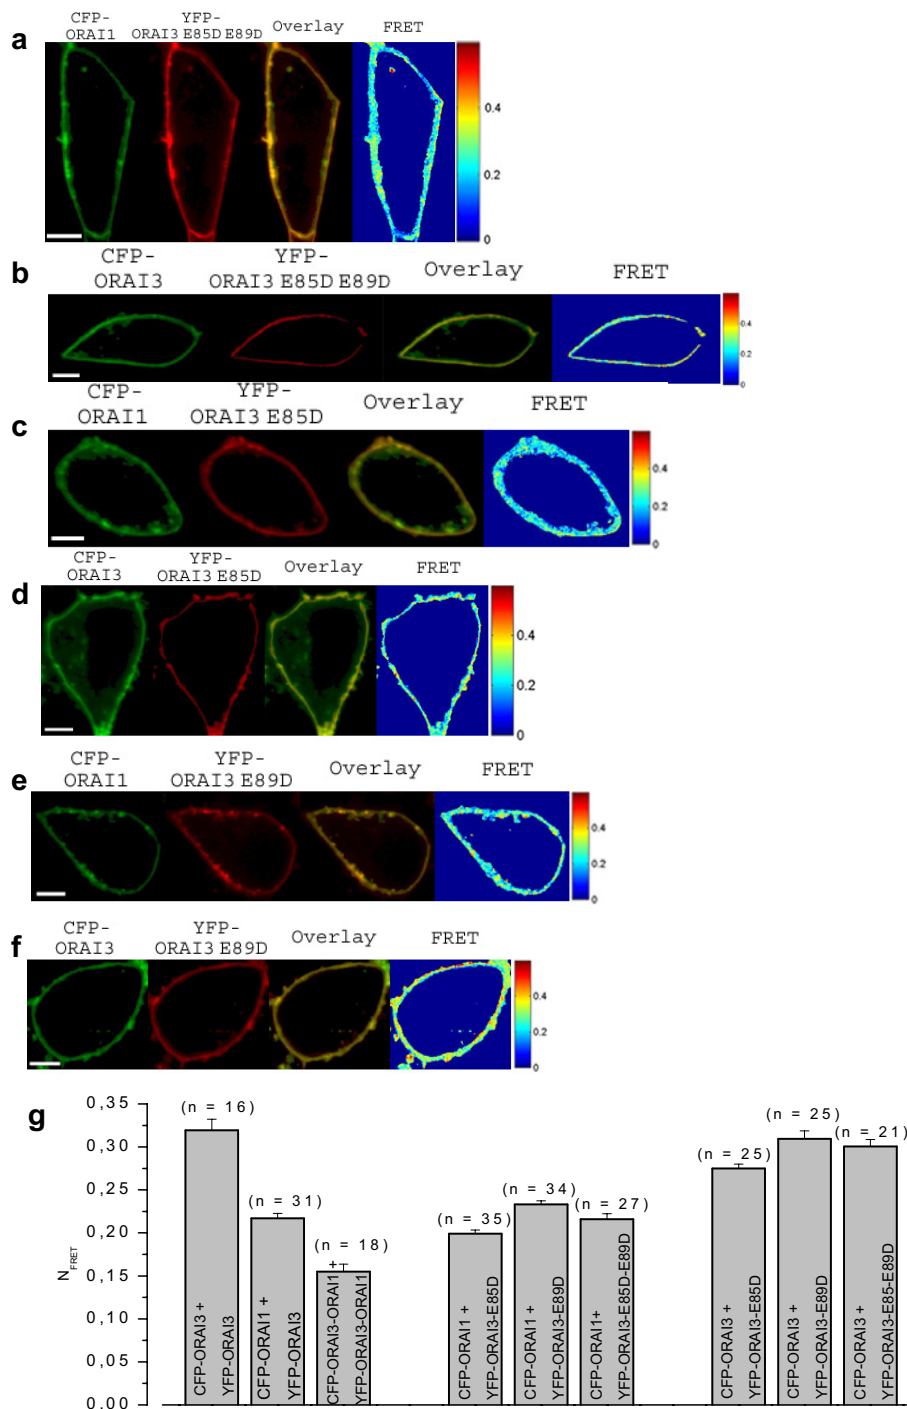

**Fig. S1.** FRET series of Orai3 pore mutants. (a) Co-expression of CFP-Orai1 and YFP-Orai3-E85D-E89D, (b) CFP-Orai3 and YFP-Orai3-E85-E89D, (c) CFP-Orai1 and YFP-Orai3-E85D, (d) CFP-Orai3 and YFP-Orai3-E85D, (e) CFP-Orai1 and YFP-Orai3-E89D, and (f) CFP-Orai3 and YFP-Orai3-E89D, overlay and calculated FRET. (g) Average FRET values determined for the constructs shown in (a–f).
